# Supplementary material
Source: Springer Nature journal article supplement (https://www.springermedizin.de/resource/supplementary/13069_2010_34_MOESM6_ESM.pdf/9659636)

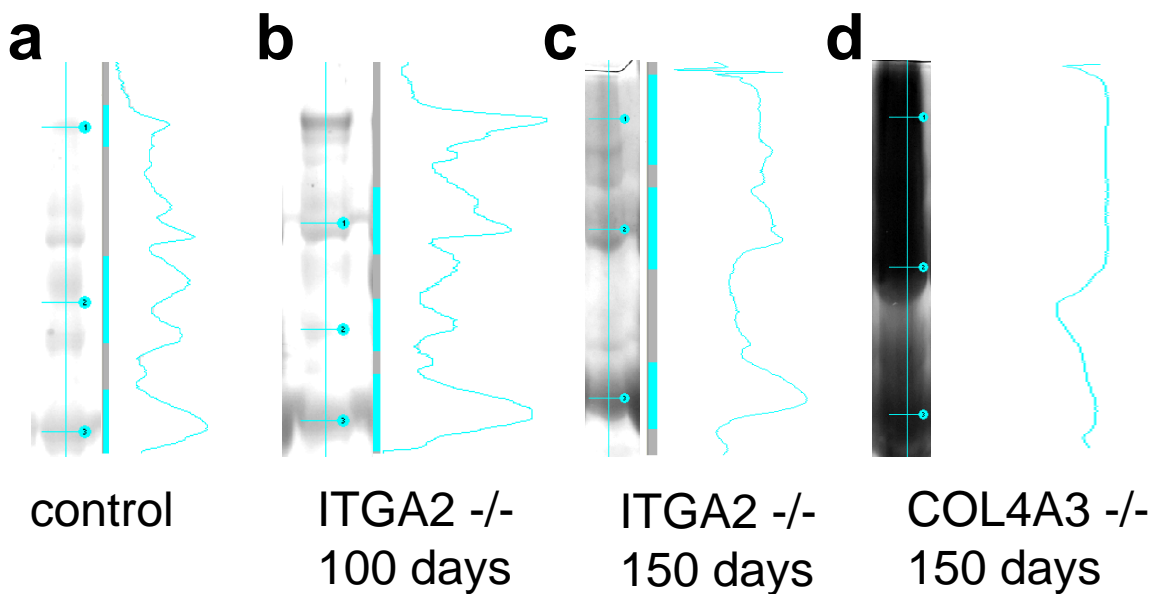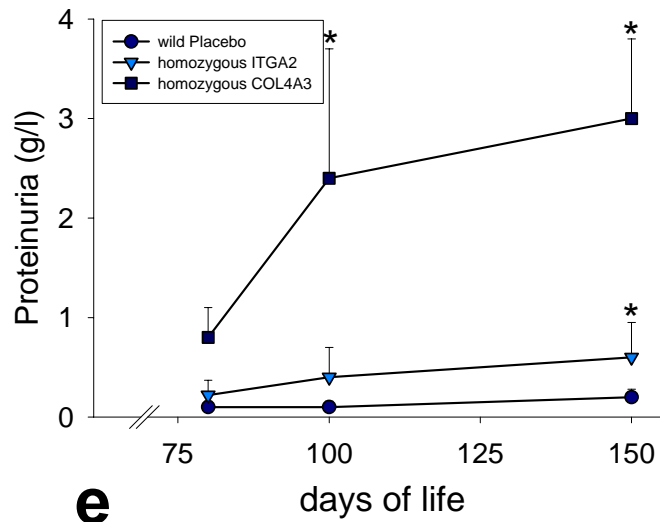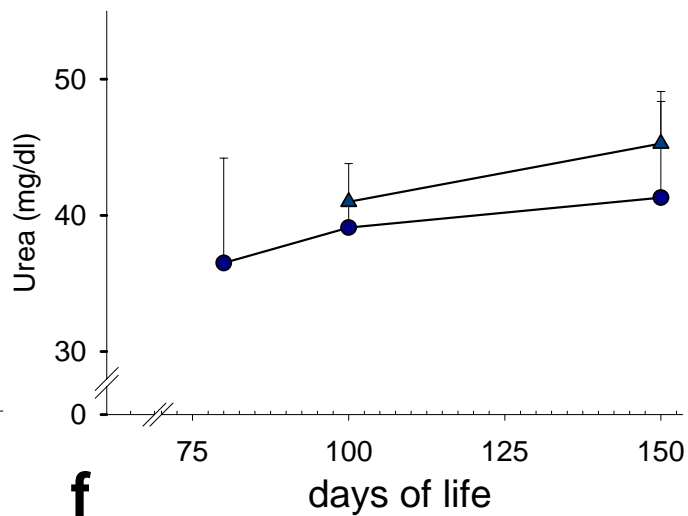

Supplement: MOESM6 [file 9659636]
